# Supplementary material for: Photovoltage as a quantitative probe of carrier generation and recombination in organic photovoltaic cells
Source: Royal Society of Chemistry journal article supplement (doi:10.1039/c7tc04246a), 2017-01-01
Supplement: c7tc04246a1.pdf [file c7tc04246a1.pdf]

## Supporting Information

### Photovoltage as a quantitative probe of carrier generation and recombination in organic photovoltaic cells

Tao Zhang and Russell Holmes\*

Department of Chemical Engineering and Materials Science, University of Minnesota,  
Minneapolis, MN 55455, United States

#### 1. Comparison between charge extraction decay and open-circuit voltage decay

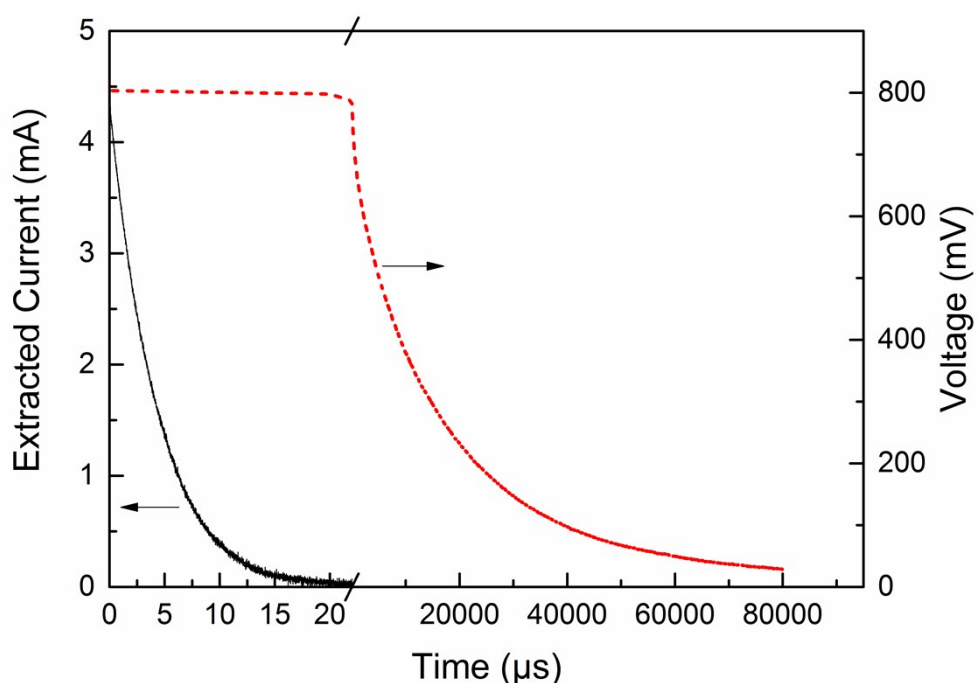

**Figure S1.** (Solid black line) Decay of extracted current obtained by switching the DTDCPB-C<sub>60</sub> BHJ in Figure 1d from open-circuit ( $V_{OC} = 797$  mV) to short-circuit. (Broken red line) Voltage decay ( $V_{OC} = 803$  mV at  $t = 0$  μs) of the DTDCPB-C<sub>60</sub> BHJ device at open-circuit. The illumination to provide initial  $V_{OC}$  is turned off at  $t = 0$  μs.

## 2. Lifetime of free charge carriers

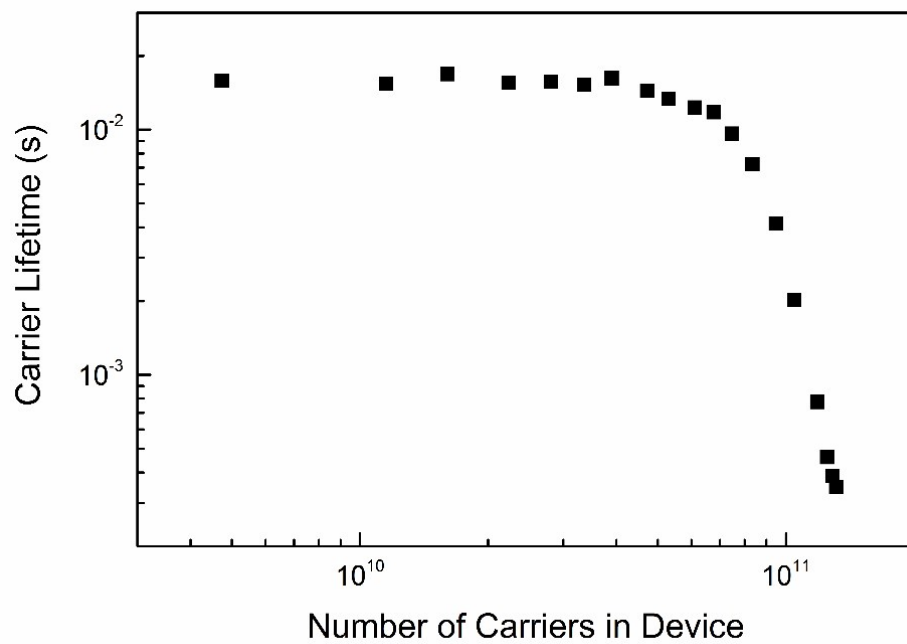

**Figure S2.** Carrier lifetime as a function of carrier number in DTDCPB-C<sub>60</sub> BHJ. The lifetime here is derived as the ratio of carrier number to carrier recombination rate measured in Figure 3b.

## 2. Additional plots of carrier rise and decay

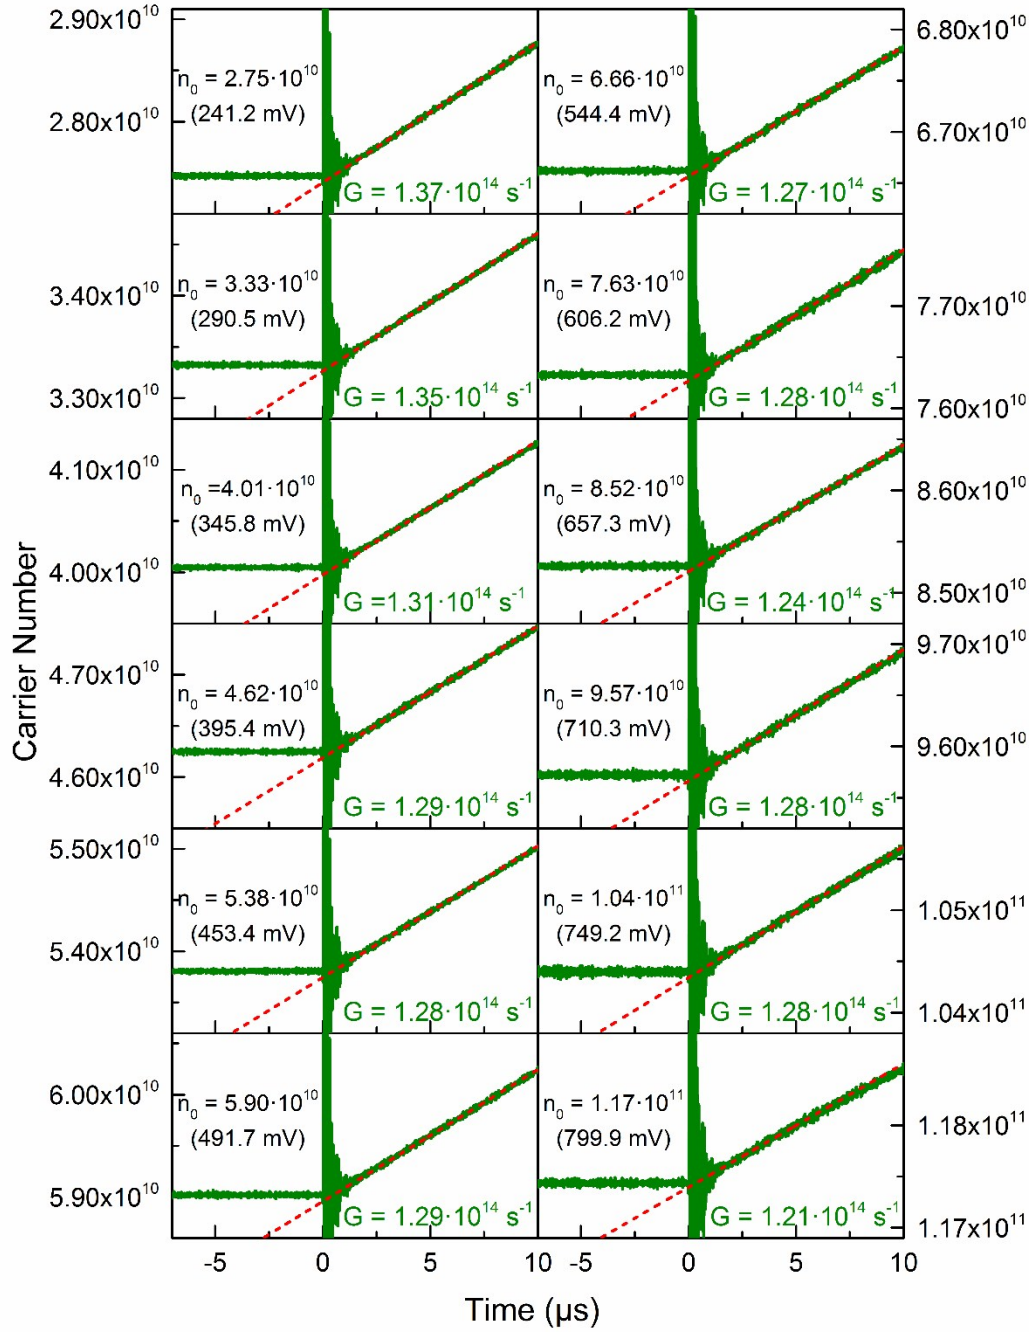

**Figure S3.** Plots of charge carrier rise within the device in Figure 3 versus time for measurement of carrier generation rate ( $G$ ). The rates are approximated as the slope of linear rise region (first 5  $\mu s$ ). The operating voltages ( $V_{OP} = 241.2 - 799.9$  mV) corresponding to  $n_0$  are shown in brackets. The device is held at steady state before  $t = 0$   $\mu s$  using constant background illumination (blue LED). A second green LED is turned on at  $t = 0$   $\mu s$  and leads to increase in carrier number stored within the device.

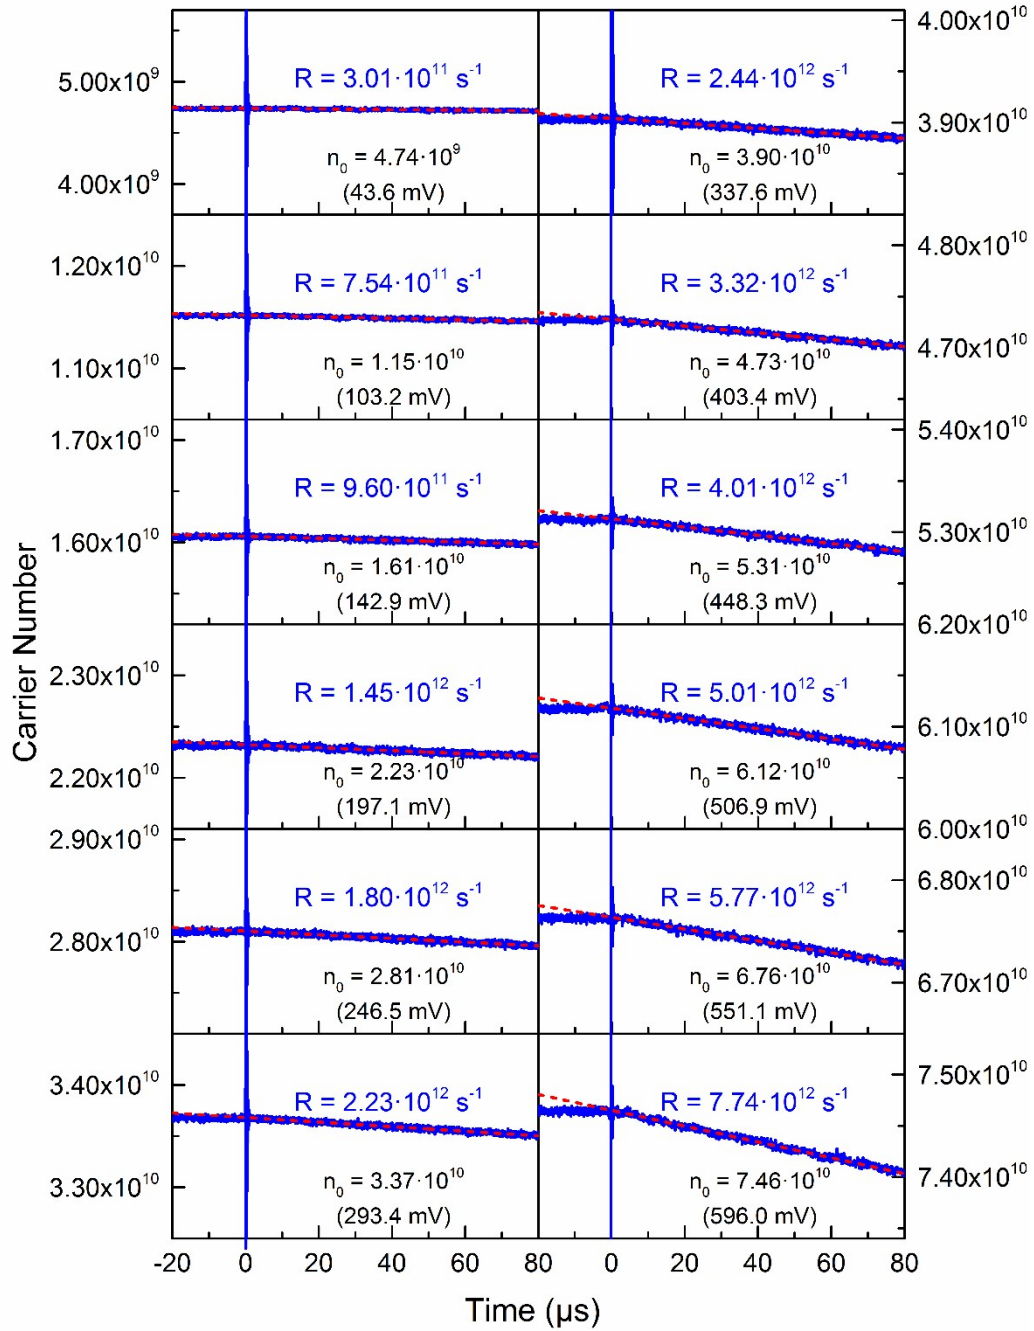

**Figure S4.** Plots of charge carrier decay within the device in Figure 3 ( $V_{OP} = 43.6 - 596.0$  mV) for measurement of carrier recombination rate ( $R$ ). The rates are approximated as the slope of linear decay region (first 20  $\mu s$ ). The operating voltages correspond  $n_0$  are shown in brackets. The device is held at steady state before  $t = 0$   $\mu s$  using constant background illumination (blue LED). Background illumination is turned off at  $t = 0$   $\mu s$  and leads to decrease in carrier number stored within the device.

#### 4. Intensity dependent short-circuit current

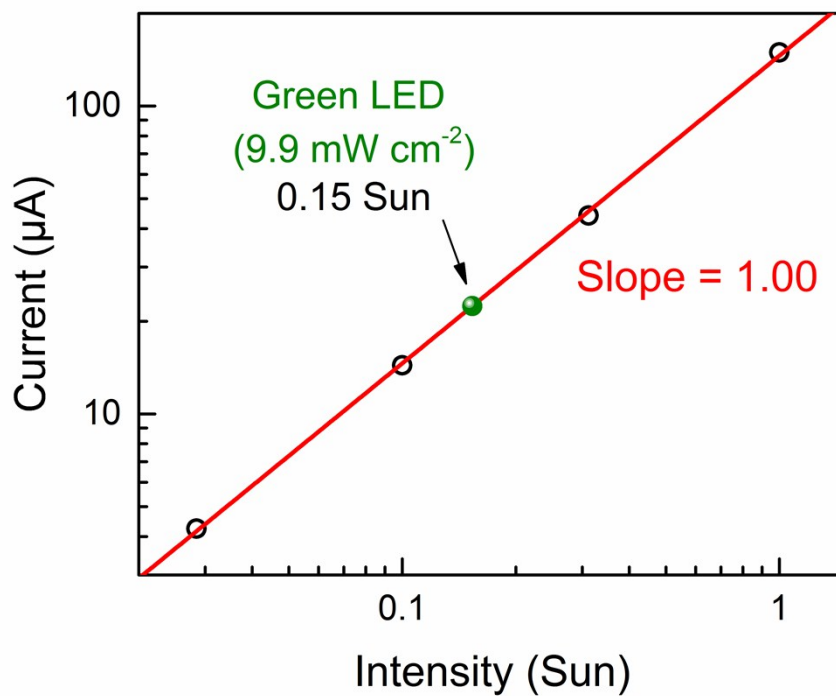

**Figure S5.** Short-circuit current ( $I_{SC}$ ) of the DTDCPB- $\text{C}_{60}$  BHJ in Figure 1d as a function of simulated AM1.5G light intensity (open circle) in logarithmic scale. A linear fit (solid red line) with a slope of 1.00 to the data is also shown. The  $I_{SC}$  in Figure 4 (illuminated by a green LED) is corresponding to a short-circuit current generated by 0.15 Sun simulated AM1.5G illumination.

## 5. Intensity dependence of extracted carriers and generation current

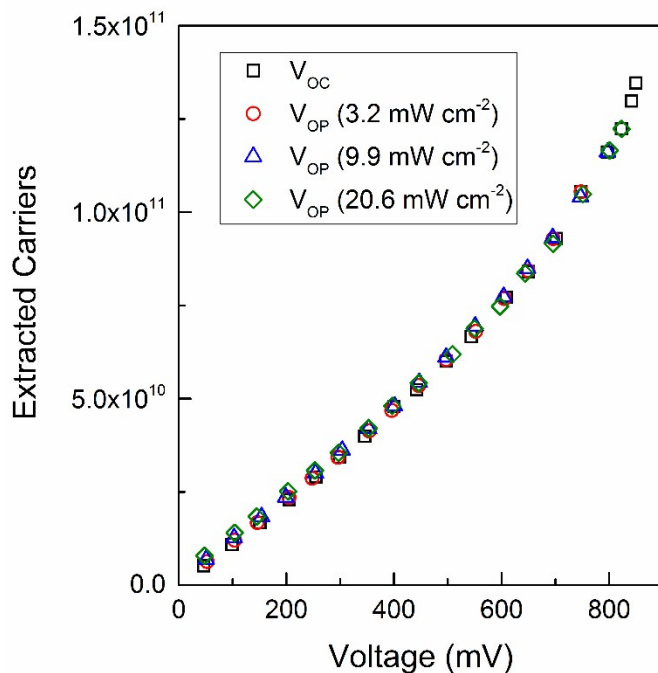

**Figure S6.** The number of extracted carriers as a function of open-circuit voltage ( $V_{OC}$ ) and operating voltage ( $V_{OP}$ ) derived by integrating current transients with respect to time.

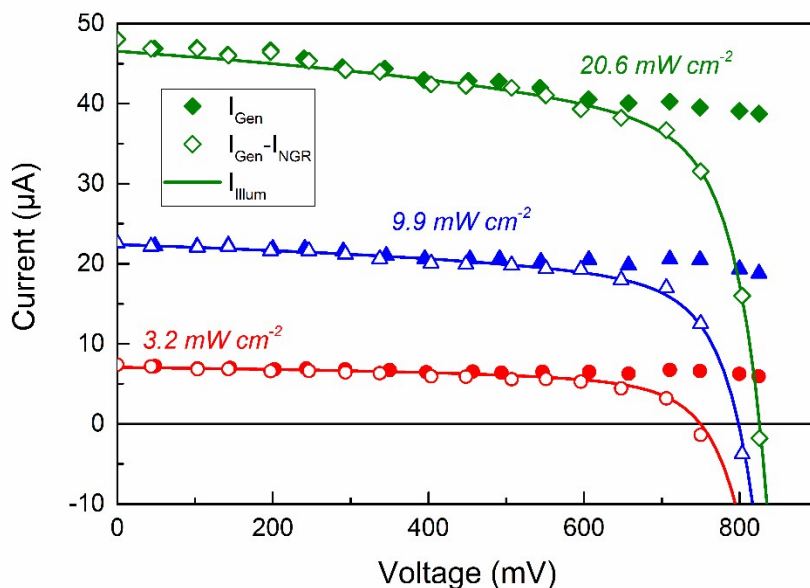

**Figure S7.** Generation current, illumination current and recreated illumination current using  $I_{NGR}$  from TPV measurement as a function of voltage in DTDCPB- $C_{60}$  BHJ under green LED illumination (3.2/9.9/20.6  $mW\ cm^{-2}$ ).

## 6. Charge collection efficiency determined by reverse bias external quantum efficiencies

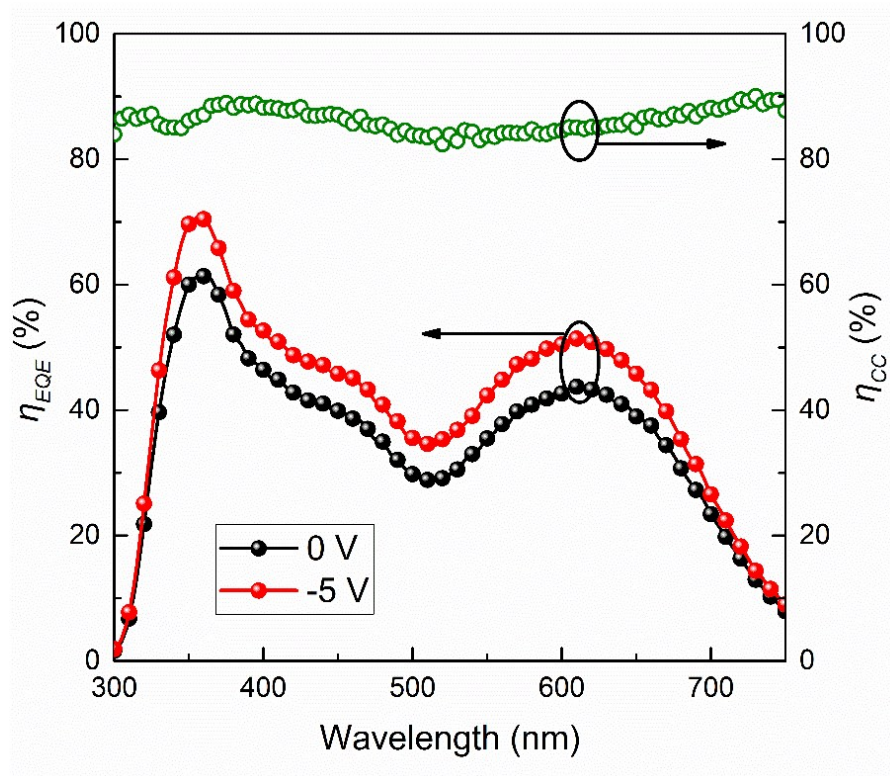

**Figure S8.** External quantum efficiency ( $\eta_{EQE}$ ) of the DTDCPB- $C_{60}$  BHJ in Figure 1d at short-circuit (black closed symbols) and -5 V (red closed symbols). The absorption efficiency ( $\eta_A$ ) is approximated as the reverse bias  $\eta_{EQE}$  at -5 V. The charge collection efficiency ( $\eta_{CC}$ ) is determined as the ratio of short-circuit  $\eta_{EQE}$  to  $\eta_A$ .



## 7. Comparison between $I_{Gen}$ and $I_{Illum}-I_{Dark}$ difference

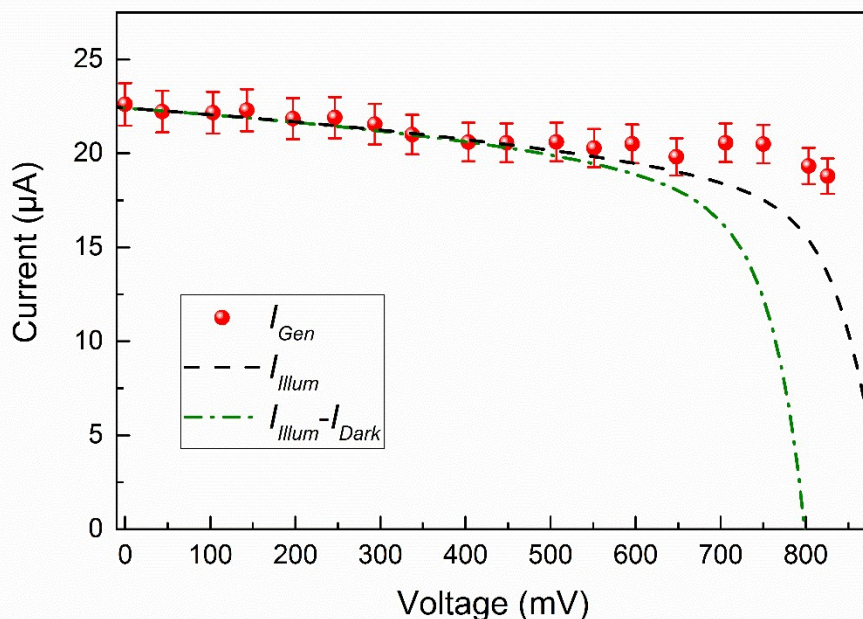

**Figure S9.** Carrier generation current ( $I_{Gen}$ ) extracted from photovoltage measurements compared to the difference between the measured illuminated current ( $I_{Illum}$ ) and dark current ( $I_{Dark}$ ) of the DTDCPB- $C_{60}$  BHJ in Figure 1d as a function of applied voltage.

To understand whether the difference between  $I_{Illum}$  and  $I_{Dark}$  is a good approximation for the  $I_{Gen}$  for the DTDCPB- $C_{60}$  BHJ in Figure 4, both  $I_{Gen}$  (from photovoltage) and the approximate  $I_{Gen}$  ( $I_{Illum}-I_{Dark}$ ) are plotted as a function of voltage in Figure S7. The  $I_{Illum}-I_{Dark}$  difference is in good agreement with the photovoltage-extracted  $I_{Gen}$  up to 600 mV, where the  $I_{NGR}$  is much lower than  $I_{Gen}$ . When the  $I_{NGR}$  increases with voltage ( $> 600$  mV), the  $I_{Illum}-I_{Dark}$  difference is smaller than  $I_{Gen}$ . This is likely due to the increased carrier density in the active layer under illumination compared to in the dark, especially under high forward bias, which leads to a larger  $I_{NGR}$ .



## 8. Comparison between $I_{Gen}$ and $I_{Illum}-I_{Dark}$ difference

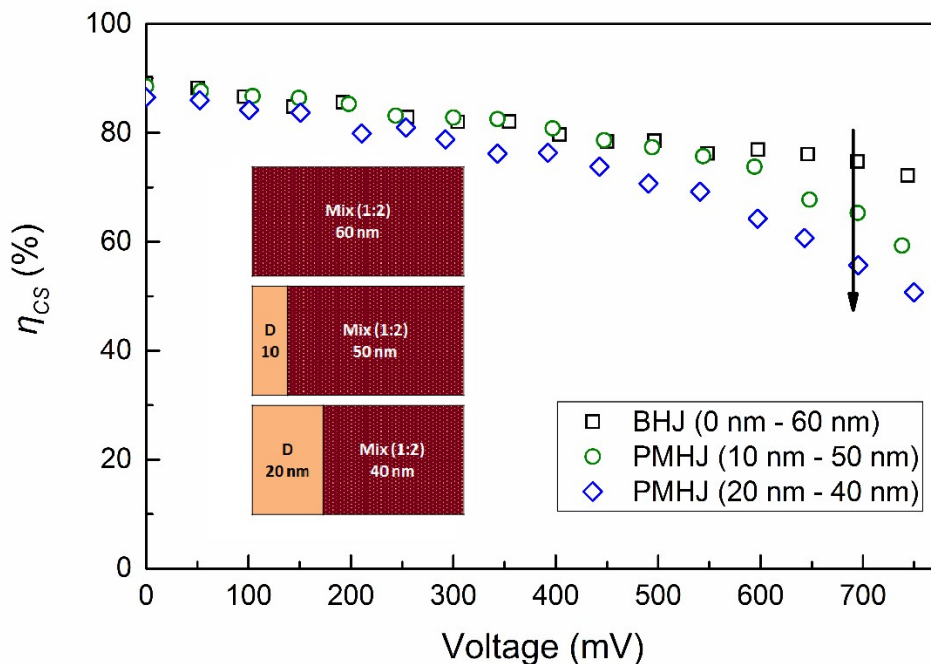

**Figure S10.** Charge separation efficiency ( $\eta_{CS}$ ) of OPVs with the following structure: 10 nm  $\text{MoO}_x$ /x nm DTDCPB/ (60-x) nm DTDCPB- $\text{C}_{60}$  (1:2) mixture/10 nm BCP/100 nm Al. The  $\eta_{CS}$  as a function of voltage is measured as described in main text using a blue LED (455 nm) with intensity of  $14.7 \text{ mW cm}^{-2}$ .

To understand the origin of severe geminate recombination loss in DTDCPB- $\text{C}_{60}$  PHJ, the role of neat DTDCPB in CT state separation is examined. Figure S8 shows the charge separation efficiency ( $\eta_{CS}$ ) of DTDCPB- $\text{C}_{60}$  OPVs with 60-nm-thick active layer as a function of neat DTDCPB layer thickness. Blue LED illumination (mostly absorbed by  $\text{C}_{60}$ ) is employed to only populate CT states in mixture. As built-in voltage ( $V_{bi}$ ) is mainly determined by work function difference between electrodes, we assume change in  $V_{bi}$  is not significant as a function with neat layer thickness. The result shows that the  $\eta_{CS}$  decreases with DTDCPB thickness for a given applied voltage ( $V$ ), especially for high forward bias, when the driving voltage ( $V_{bi}-V$ ) is small. As the physical environment of CT states in mixture are the same (charge carrier mobility, lifetime of CT states and dielectric constant),  $\eta_{CS}$  is only depends on strength of electric field. Therefore, the decreased  $\eta_{CS}$  with DTDCPB thickness suggests that neat DTDCPB consume more built-in field than mixture. A thicker neat layer leads to weaker electric field at donor-acceptor interface and lower  $\eta_{CS}$  for the same driving voltage.

## 9. LED spectra

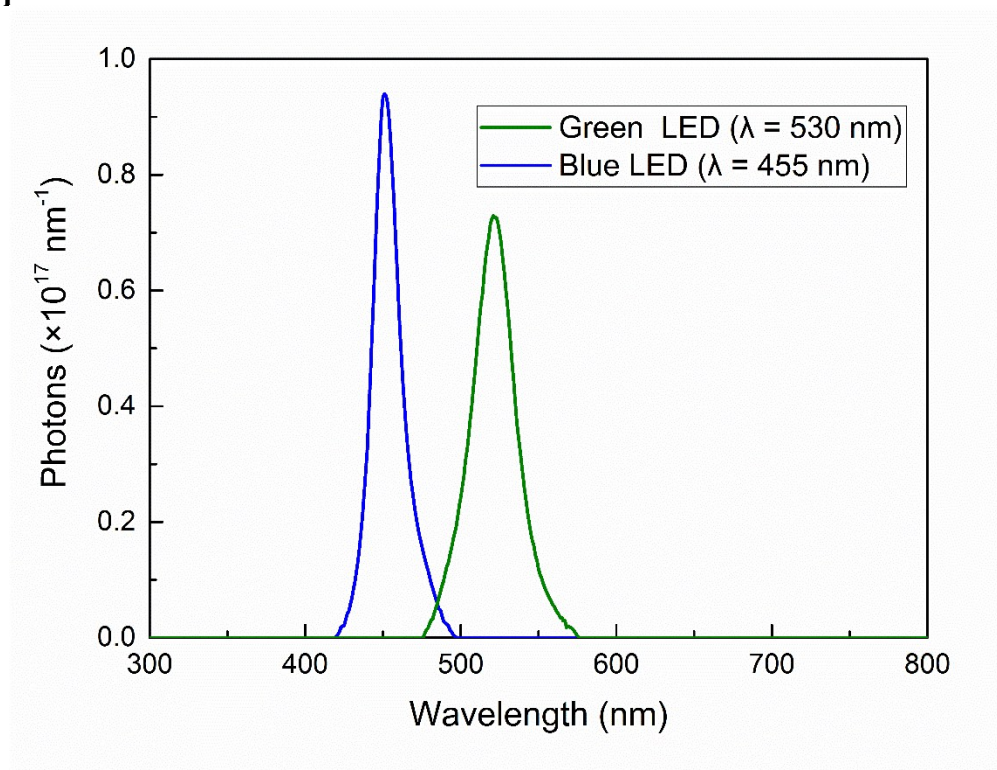

**Figure S11.** Pump spectra for LEDs peaked at wavelengths of  $\lambda = 455$  nm (blue) and  $\lambda = 530$  nm (green). The spectra are normalized to 1 W illumination through an aperture with an area of 0.0176 cm<sup>2</sup>.

## 9. Device performance under 1 sun illumination

| <i>1 Sun Parameters</i>          | $V_{OC}$ (V) | $J_{SC}$ (mA cm <sup>-2</sup> ) | FF   | $\eta_P$ (%) |
|----------------------------------|--------------|---------------------------------|------|--------------|
| <i>DTDCPB-C<sub>60</sub> BHJ</i> | 0.86         | 8.46                            | 0.67 | 4.86         |
| <i>DTDCPB-C<sub>60</sub> PHJ</i> | 0.80         | 0.82                            | 0.22 | 0.15         |
| <i>CuPc-C<sub>60</sub> PHJ</i>   | 0.24         | 3.55                            | 0.52 | 0.44         |

**Table S1.** Performance of devices in Figure 1d under simulated AM1.5G 1 Sun illumination. All devices were illuminated through an aperture with an area of 0.0176 cm<sup>2</sup>.

The performance of devices studied in this work (AM1.5G 1 Sun) are shown in Table S1. The DTDCPB-based BHJ has been used to demonstrate high  $\eta_P$  (8~10%) when using C<sub>70</sub> as the electron acceptor material.
